# Supplementary material for: Psychosocial Determinants of Fruit and Vegetable Consumption in a Japanese Population
Source: Int J Environ Res Public Health. 2016 Aug 5;13(8):786. doi: 10.3390/ijerph13080786 (PMC4997472; doi:10.3390/ijerph13080786)
Supplement: Supplementary file 1 [file ijerph-13-00786-s001.pdf]

# Supplementary Materials: Psychosocial Determinants of Fruit and Vegetable Consumption in a Japanese Population

Da-Hong Wang, Michiko Kogashiwa, Naoko Mori, Shikibu Yamashita, Wakako Fujii, Nobuo Ueda, Hiroto Homma, Hisao Suzuki and Noriyoshi Masuoka

## 1. Table S1

**Table S1.** Are you aware of the current recommendations for the daily intake of vegetables?

| Variable | Yes         | No           | Non-Response |
|----------|-------------|--------------|--------------|
| Women    | 436 (33.6%) | 856 (66.0%)  | 4 (0.3%)     |
| Men      | 137 (13.5%) | 869 (85.9%)  | 6 (0.59%)    |
| Total    | 573 (24.8%) | 1725 (74.7%) | 10 (0.4%)    |

## 2. Table S2

**Table S2.** Recognition of daily amount of vegetable recommendation among people who reported that they were aware of the recommendations.

| Variable | Right Answer (350 g) | Wrong Answer | Non-Response |
|----------|----------------------|--------------|--------------|
| Women    | 340 (78.0%)          | 93 (21.3%)   | 3 (0.7%)     |
| Men      | 77 (56.2%)           | 58 (42.3%)   | 2 (1.5%)     |
| Total    | 417 (72.8%)          | 151 (26.4%)  | 5 (0.8%)     |

## 3. Table S3

**Table S3.** Are you aware of the current recommendations for the daily intake of fruits?

| Variable | Yes         | No           | Non-Response |
|----------|-------------|--------------|--------------|
| Women    | 254 (19.6%) | 1036 (79.9%) | 6 (0.5%)     |
| Men      | 51 (5.0%)   | 956 (94.5%)  | 5 (0.5%)     |
| Total    | 305 (13.2%) | 1992 (86.3%) | 11 (0.5%)    |

## 4. Table S4

**Table S4.** Recognition of daily amount of fruit recommendation among people who reported that they were aware of the recommendations.

| Variable | Right Answer (200 g) | Wrong Answer |
|----------|----------------------|--------------|
| Women    | 147 (57.9%)          | 107 (42.1%)  |
| Men      | 22 (43.1%)           | 29 (56.9%)   |
| Total    | 169 (55.4%)          | 136 (44.6%)  |

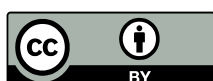

© 2016 by the authors; licensee MDPI, Basel, Switzerland. This article is an open access article distributed under the terms and conditions of the Creative Commons by Attribution (CC-BY) license (<http://creativecommons.org/licenses/by/4.0/>).
